# Supplementary material for: Microporous Polymer-Modified Glassy Carbon Electrodes for the Electrochemical Detection of Metronidazole: Experimental and Theoretical Insights
Source: MDPI journal article supplement (doi:10.3390/nano14020180), 2024-01-12
Supplement: s1 [file s1]

## **SUPPLEMENTARY MATERIALS**

### **Microporous Polymer Modified Glassy Carbon Electrodes for Electrochemical Detection of Metronidazole: Experimental and Theoretical Insights**

**Héctor Quiroz-Arturo <sup>1</sup>, Carlos Reinoso <sup>2</sup>, Ullrich Scherf <sup>3,\*</sup>, and Alex Palma-Cando <sup>1,\*</sup>**

<sup>1</sup> Grupo de Investigación Aplicada en Materiales y Procesos (GIAMP), School of Chemical Sciences and Engineering, Yachay Tech University, Hda. San José s/n y Proyecto Yachay, 100115 Urcuqui, Ecuador

<sup>2</sup> School of Physical Sciences and Nanotechnology, Yachay Tech University, Hda. San José s/n y Proyecto Yachay, 100115 Urcuqui, Ecuador

<sup>3</sup> Department of Chemistry, Macromolecular Chemistry and Wuppertal Center for Smart Materials @ Systems (CM@S), Bergische Universität Wuppertal, Gaußstr. 20, 42119 Wuppertal, Germany

\* Correspondence: [scherf@uni-wuppertal.de](mailto:scherf@uni-wuppertal.de) (U. S.); [apalma@yachaytech.edu.ec](mailto:apalma@yachaytech.edu.ec) (A. P.-C.)

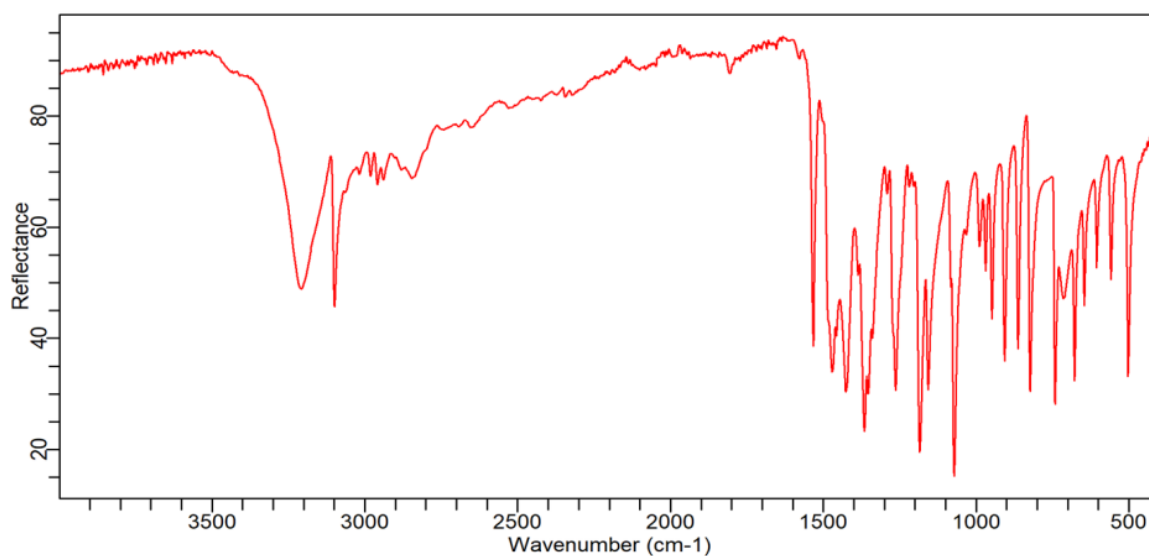

**Figure S1.** FT-IR spectrum of purified metronidazole. The  $1263.57\text{ cm}^{-1}$  and  $1185.29\text{ cm}^{-1}$  peaks correspond to the bonds  $\text{--C=C--}$  and  $\text{--C=N--}$  of the imidazole cycle. The broad absorption band at  $3211.10\text{ cm}^{-1}$  and the peak at  $3099.28\text{ cm}^{-1}$  indicate the presence of hydroxyl group. Absorption bands at  $1533.8\text{ cm}^{-1}$  and  $1366.07\text{ cm}^{-1}$  correspond to the stretching vibrations of the  $\text{NO}_2$  group [S1,S2].

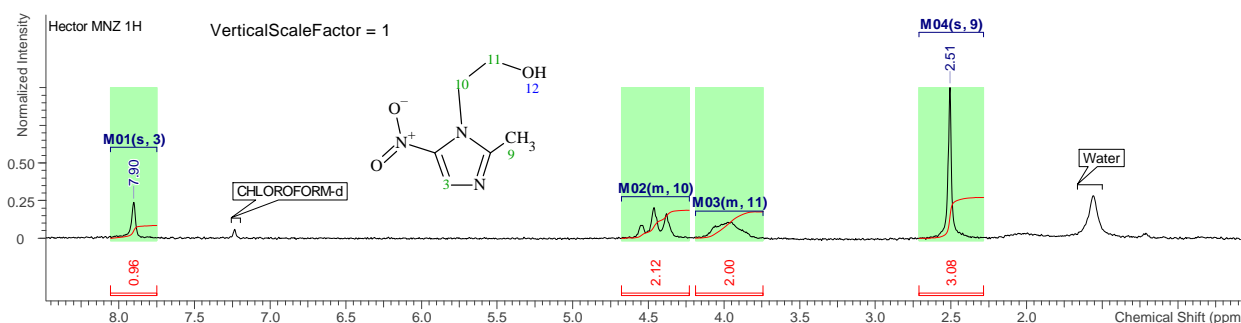

**Figure S2.** NMR spectrum for purified metronidazole.  $^1\text{H}$  NMR (60 MHz,  $\text{CHLOROFORM-d}$ )  $\delta$  ppm 2.51 (s, 3 H) 3.74 - 4.19 (m, 2 H) 4.23 - 4.68 (m, 2 H) 7.90 (s, 1 H). No hydroxyl proton signal was identified [S3].

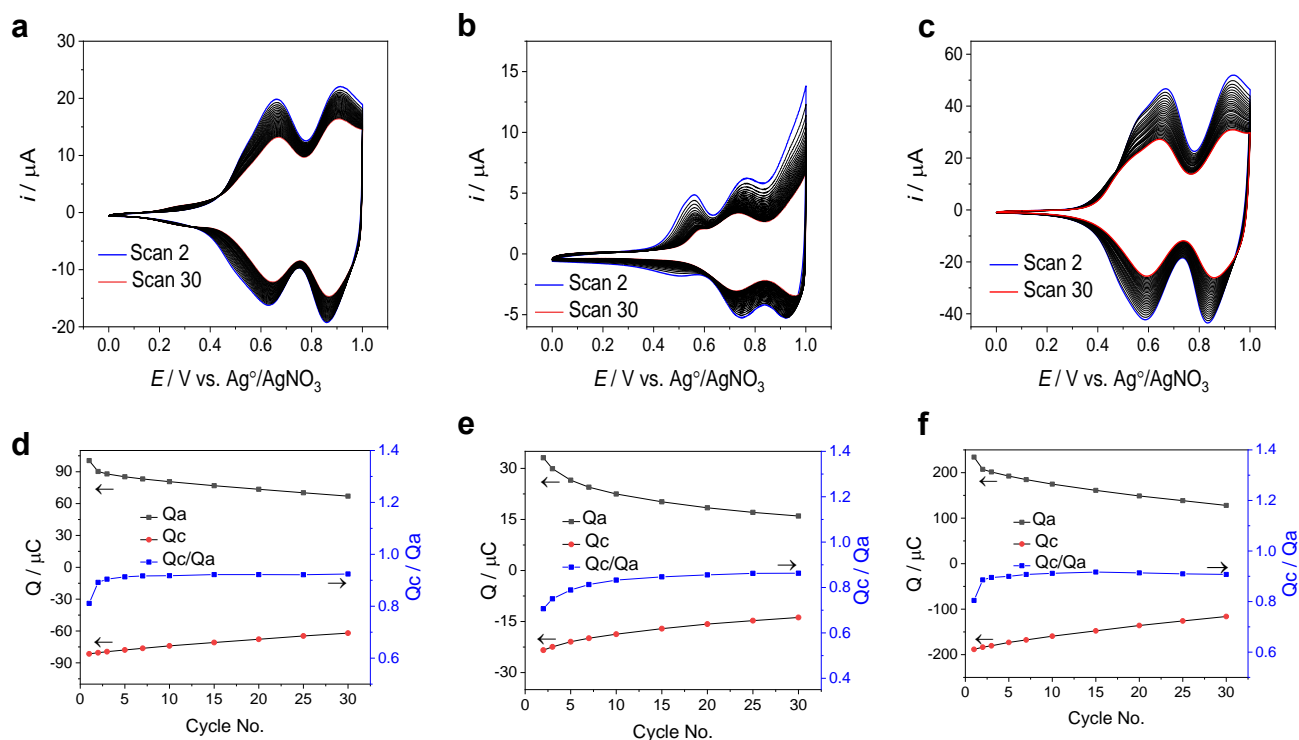

**Figure S3.** Electrochemical stability of (a) PCBP, (b) PTCB, and (c) PTPTCzSiOH films on GCE obtained in a free monomer solution, ACN/TBAP 0.1 M. The applied potential range was 0 – 1.0 V with a sweeping rate of 0.1 V/s. The variation of the anodic and cathodic charge (Qa and Qc, left axis) and the Qc/Qa (right axis, blue curve) during the 30 cycles for (d) PCBP, (e) PTCB, and (f) PTPTCzSiOH films on GCE are also shown.

**Table S1.** Electrochemical stability and reversibility of polymer films in ACN/TBAP 0.1M represented as the percentage of cathodic current loss between the second and thirtieth cycle (%Qc), and cathodic to anodic charge ratio at the thirtieth cycle (Qc/Qa), respectively.

| Polymer    | % Qc | Qc/Qa |
|------------|------|-------|
| PCBP       | 23.0 | 0.92  |
| PTCB       | 40.9 | 0.86  |
| PTPTCzSiOH | 36.7 | 0.91  |

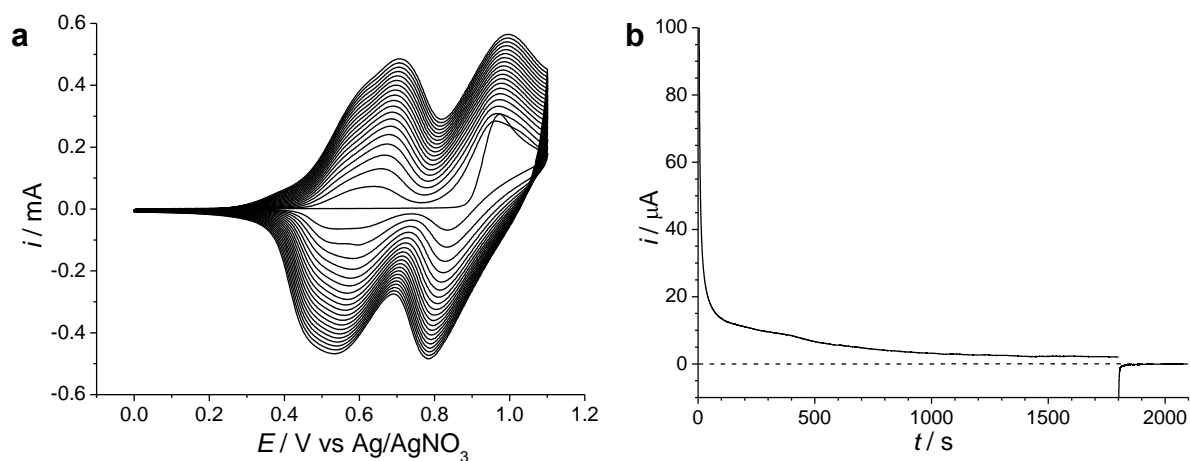

**Figure S4.** (a) Electropolymerization of TPTCzSiOH film on ITO scanning from 0 V vs. Ag/AgNO<sub>3</sub> to 1.1 V for 20 cycles at 0.1 Vs-1 in a 0.1 M TBAP/ACN solution with 0.1 mM monomer concentration. (b) Chronoamperograms for thin ITO-PTPTCzSiOH films with an oxidative potential applied of 1 V for 30 min followed by a dedoping potential of 0 V for 5 min.

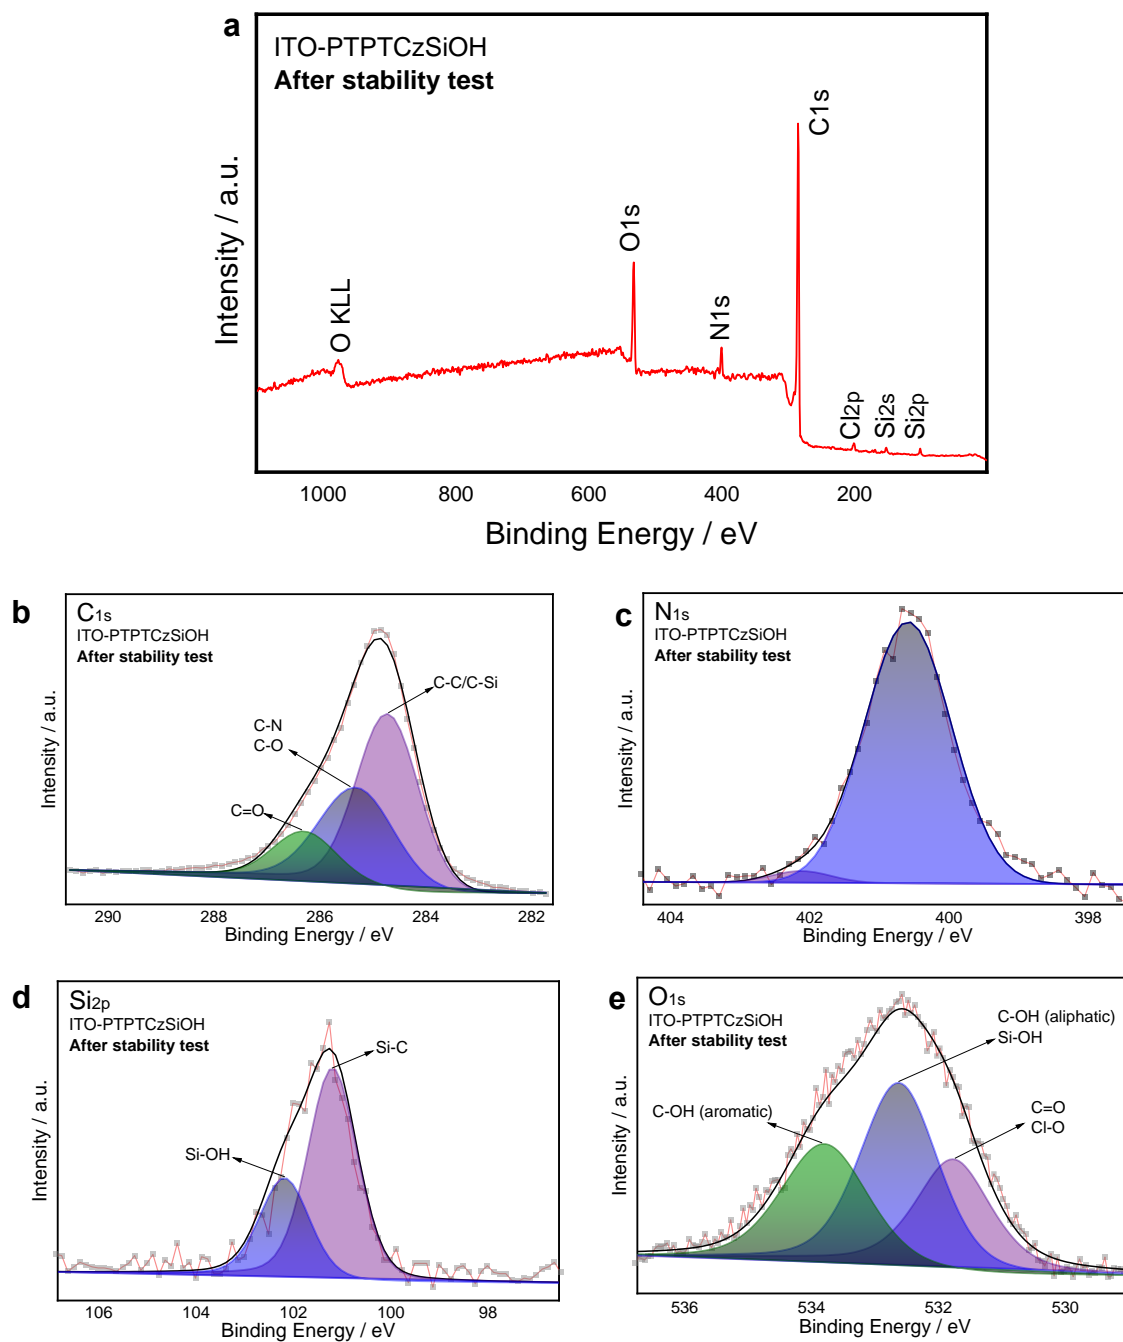

**Figure S5.** XPS spectra of the (a) survey scan, and high-resolution spectra of (b) C1s, (c) N1s, (d) Si2p, and (e) O1s of ITO- PTPTCzSiOH electrode after the oxidative treatment described in Figure S4.

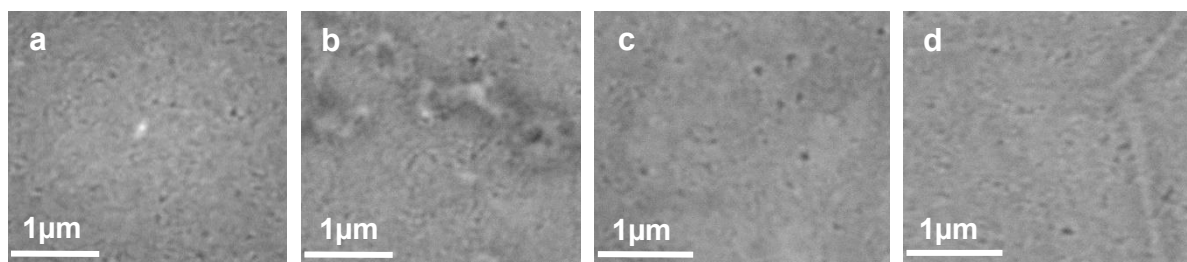

**Figure S6.** The top-view SEM topographies of (a) bare ITO, (b) PCBP-ITO, (c) PTCB-ITO, and (d) PTPTCzSiOH-ITO electrodes.

**Table S2.** Current response for the cathodic reduction peak in the electrochemical detection of 50  $\mu$ M MNZ. The current ratios of the peak between MPN-modified and non-modified GC electrodes are also listed.

| Electrode     | $E_p$ (V) | $i_p$ ( $\mu$ A) | $i_p/i_{p\text{ GC}}$ |
|---------------|-----------|------------------|-----------------------|
| GC            | -0.60     | -6.60            | 1.0                   |
| GC-PCBP       | -0.89     | -13.0            | 1.9                   |
| GC-PTCB       | -0.66     | -22.6            | 3.4                   |
| GC-PTPTCzSiOH | -0.88     | -23.9            | 3.6                   |

**Table S3.** Experimental and theoretical values of the onset oxidation potential ( $E_{\text{onset}}$ ) and the energy of HOMO orbital ( $E_{\text{HOMO}}$ ).

| Monomer   | $E_{\text{onset}}$ (V) | $E_{\text{HOMO}}$ (eV)<br>experimental | $E_{\text{HOMO}}$ (eV)<br>theoretical |
|-----------|------------------------|----------------------------------------|---------------------------------------|
| CBP       | 0.86                   | -5.96                                  | -5.57                                 |
| TCB       | 1.00                   | -6.10                                  | -5.72                                 |
| TPTCzSiOH | 0.85                   | -5.95                                  | -5.62                                 |

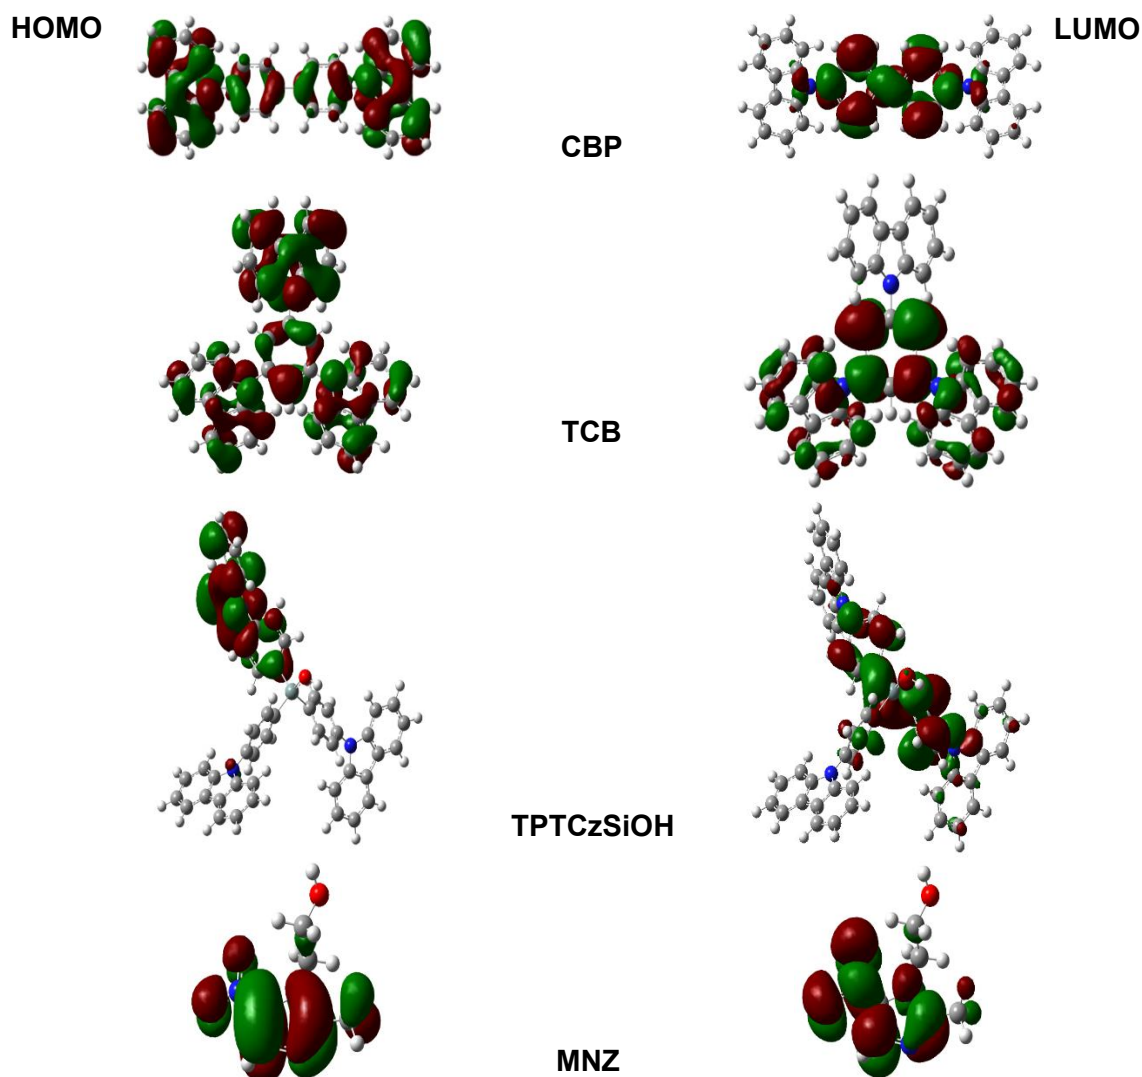

**Figure S7.** The contour representation of frontier molecular orbitals computed by DFT/B3LYP method for investigated molecules.

## References

- S1. Myhal, A. V.; Golovchenko, O.S.; Krutskikh, T. V.; Gubar, S.M.; Georgiyants, V.A. IR-Spectroscopy Research into the Structure of Products of Interaction between Metronidazole and Metal Salts. *Der Pharma Chemica* **2016**, *8*, 148–154.
- S2. Szente, V.; Baska, F.; Zelkó, R.; Süvegh, K. Prediction of the Drug Release Stability of Different Polymeric Matrix Tablets Containing Metronidazole. *Journal of Pharmaceutical and Biomedical Analysis* **2011**, *54*, 730–734, doi:10.1016/j.jpba.2010.11.005.
- S3. Kalinowska-Lis, U.; Felczak, A.; Checińska, L.; Zawadzka, K.; Patyna, E.; Lisowska, K.; Ochocki, J. Synthesis, Characterization and Antimicrobial Activity of Water-Soluble Silver(I) Complexes of Metronidazole Drug and Selected Counter-Ions. *Dalton Transactions* **2015**, *44*, 8178–8189, doi:10.1039/c5dt00403a.
